# Supplementary material for: Specific host metabolite and gut microbiome alterations are associated with bone loss during spaceflight
Source: PubMed Central journal article supplement — Cell Rep. Author manuscript; Available in PMC 2023 Jul 13. (PMC10344367; doi:10.1016/j.celrep.2023.112299), 2023-04-19
Supplement: NIHMS1905342-supplement-1.pdf [file NIHMS1905342-supplement-1.pdf]

**Supplemental information**

**Specific host metabolite and gut  
microbiome alterations are associated  
with bone loss during spaceflight**

**Joseph K. Bedree, Kristopher Kerns, Tsute Chen, Bruno P. Lima, Guo Liu, Pin Ha, Jiayu Shi, Hsin Chuan Pan, Jong Kil Kim, Luan Tran, Samuel S. Minot, Erik L. Hendrickson, Eleanor I. Lamont, Fabian Schulte, Markus Hardt, Danielle Stephens, Michele Patel, Alexis Kokaras, Louis Stodieck, Yasaman Shirazi-Fard, Benjamin Wu, Jin Hee Kwak, Kang Ting, Chia Soo, Jeffrey S. McLean, Xuesong He, and Wenyuan Shi**

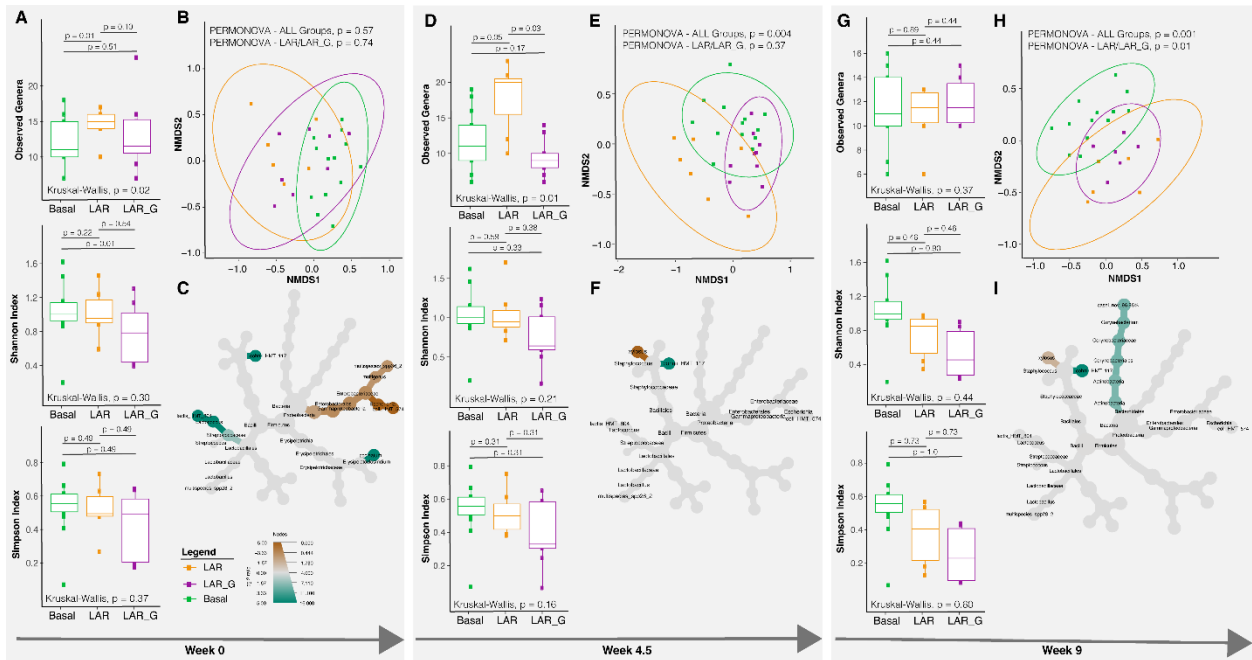

Figure S1 Longitudinal Analysis of the Oral Microbiome in the LAR Flight Cohort versus LAR\_G Ground Control.

(A, D, G) Longitudinal differences in alpha diversity of Observed genera, Shannon, and Simpson diversity indices when comparing LAR versus LAR\_G or Basal cohorts at Pre-Flight (week 0), Live Animal Return to Earth (week 4.5), and Termination (week 9) timepoints. The non-parametric Kruskal-Wallis statistical test was used to compare groups of two or more. The Wilcoxon Rank-Sum statistical test was employed for pairwise comparisons. Statistical significance is indicated accordingly.

(B, E, H) Beta diversity analysis comparing LAR versus LAR\_G or Basal cohorts at Pre-Flight (week 0), Live Animal Return to Earth (week 4.5), and the Termination (week 9) timepoints. Nonparametric multivariate analysis of variance (PERMANOVA) was used to calculate a statistical comparison of variance using distance matrices. Statistical significance is indicated accordingly.

(C, F, I) Comparative analysis of genera enriched or lost in the LAR versus LAR\_G cohorts at Pre-Flight (week 0), Live Animal Return to Earth (week 4.5), and the Termination (week 9) timepoints. Taxa enriched or lost in the LAR cohort at a threshold of  $p < 0.05$  compared to taxa present in the LAR\_G cohort are represented in the *metacoder* heat tree by a color intensity  $\text{Log}_2$  median ratio scale. P-values are indicated in the text and TableS4-6.

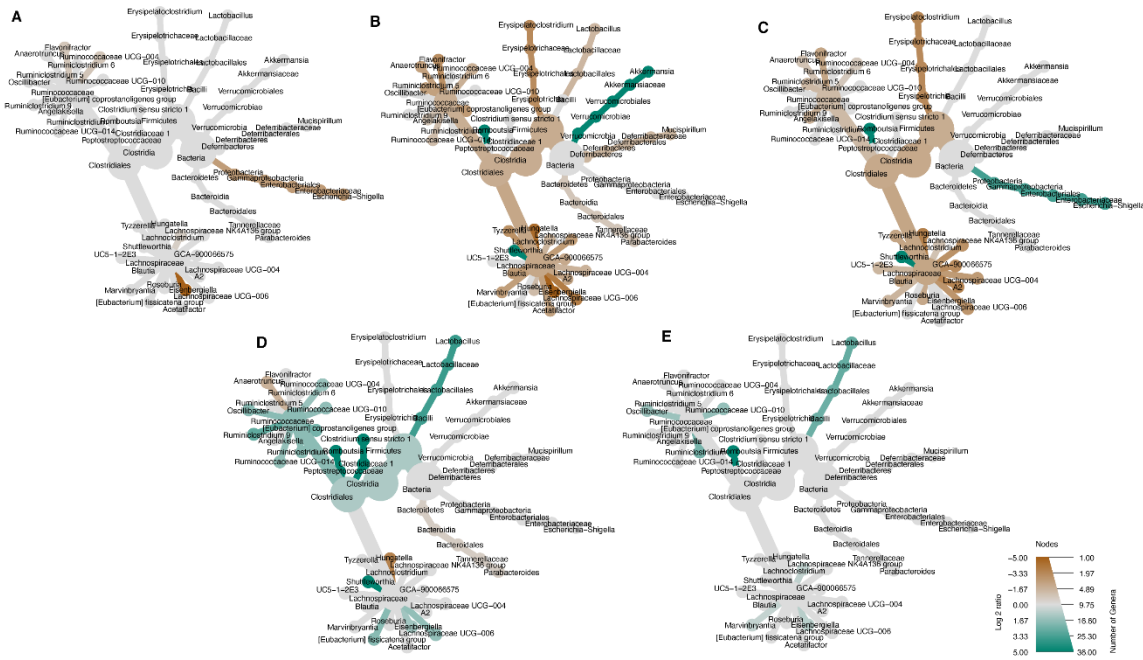

Figure S2 Fecal Necropsy Termination Analysis of Enriched or Lost Genera Evaluating Caging Effects.

(A-C) (A) Analysis of genera enriched or lost in the LAR versus LAR\_G cohort at necropsy, (B) Analysis of genera enriched or lost in the LAR versus Basal cohort, and (C) Analysis of genera enriched or lost in the LAR\_G versus Basal cohort (week 9). Taxa enriched or lost in the comparison cohorts in Figure S1A-C was at a threshold of  $p < 0.05$  and are represented in the *metacoder* heat tree by a color intensity Log<sub>2</sub> median ratio scale.

(D) Analysis of genera enriched or lost in the ISS versus Basal cohort (week 9). Taxa enriched or lost in the ISS cohort at a threshold of  $p < 0.05$  compared to taxa present in the Basal cohort are represented in the *metacoder* heat tree by a color intensity Log<sub>2</sub> median ratio scale.

(E) Analysis of genera enriched or lost in the ISS\_G versus Basal cohort (week 9). Taxa enriched or lost in the ISS\_G cohort at a threshold of  $p < 0.05$  compared to taxa present in the Basal cohort are represented in the *metacoder* heat tree by a color intensity Log<sub>2</sub> median ratio scale.
